# Supplementary material
Source: publisher figshare collection journal article supplement (https://acs.figshare.com/ndownloader/files/26779893)
Supplement: Supplementary file 1 [file 26779893]

## Supporting Information for

### “Spin Transport and Spin Thermoelectric Transport in 2D Mn-Doped Blue Phosphorene with High Curie Temperature and Half-Metallicity”

Xuming Wu,<sup>†</sup> Lei Hu,<sup>†</sup> Dandan Gu,<sup>†</sup> and Guoying Gao<sup>\*,†,‡</sup>,

<sup>†</sup> School of Physics, Huazhong University of Science and Technology, Wuhan 430074, China

<sup>‡</sup> Wuhan National High Magnetic Field Center, Huazhong University of Science and Technology, Wuhan 430074, China

\*guoying\_gao@mail.hust.edu.cn

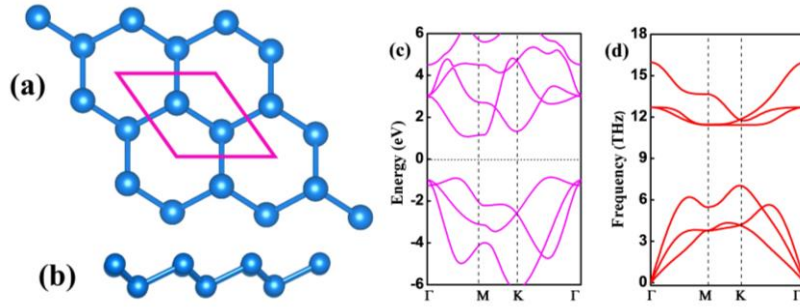

**Figure S1.** The top view (a), side view (b), band structure (c), and phonon spectrum (d) of monolayer blue phosphorene.

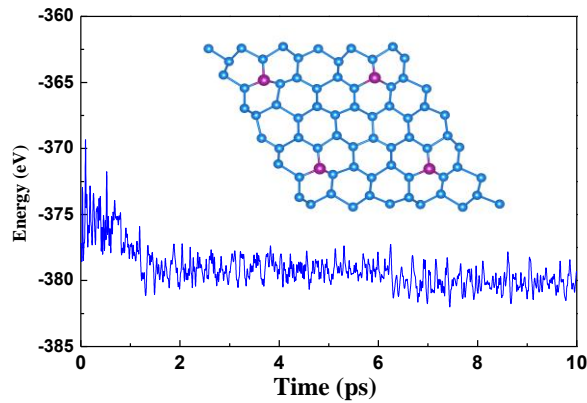

**Figure S2.** The total potential energy fluctuation of the  $6\times 6\times 1$  supercell for Mn-doped monolayer blue phosphorene during the AIMD simulations at 400 K. The inset is the structure of Mn-doped monolayer blue phosphorene at the end of 10 ps in the AIMD simulations.

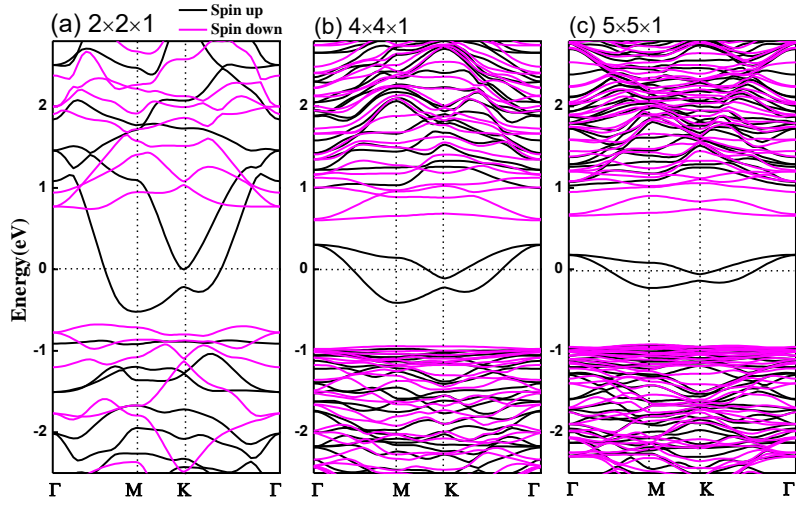

**Figure S3.** The calculated spin-dependent band structures within GGA-PBE for the Mn-doped monolayer blue phosphorene with the impurity concentration of 12.5%, 3.1% and 2% based on the  $2 \times 2 \times 1$ ,  $4 \times 4 \times 1$  and  $5 \times 5 \times 1$  supercells, respectively.

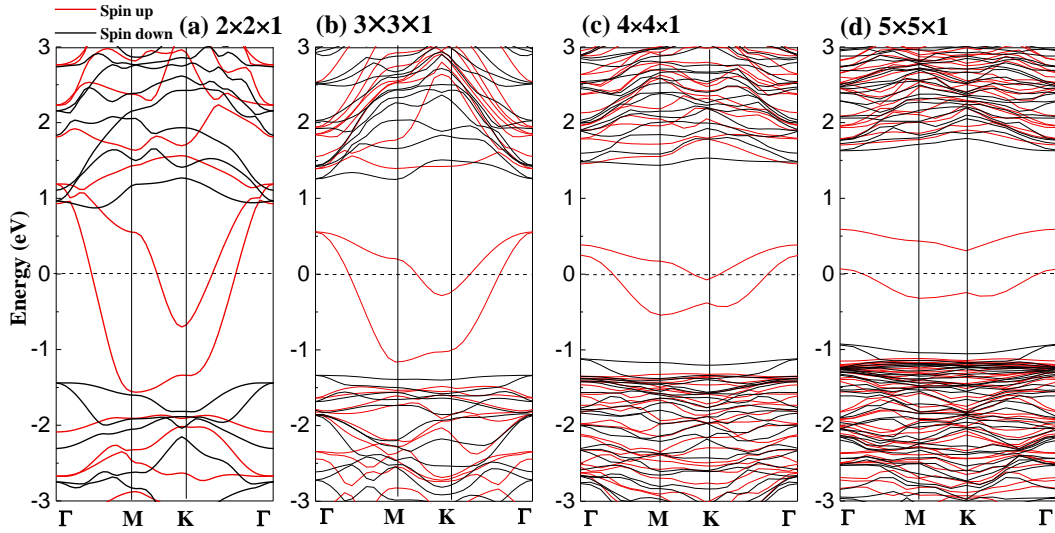

**Figure S4.** The spin-dependent band structures within HSE06 for the Mn-doped monolayer blue phosphorene with the impurity concentration of 12.5%, 5.56%, 3.1% and 2% based on the  $2 \times 2 \times 1$ ,  $3 \times 3 \times 1$ ,  $4 \times 4 \times 1$  and  $5 \times 5 \times 1$  supercells, respectively.

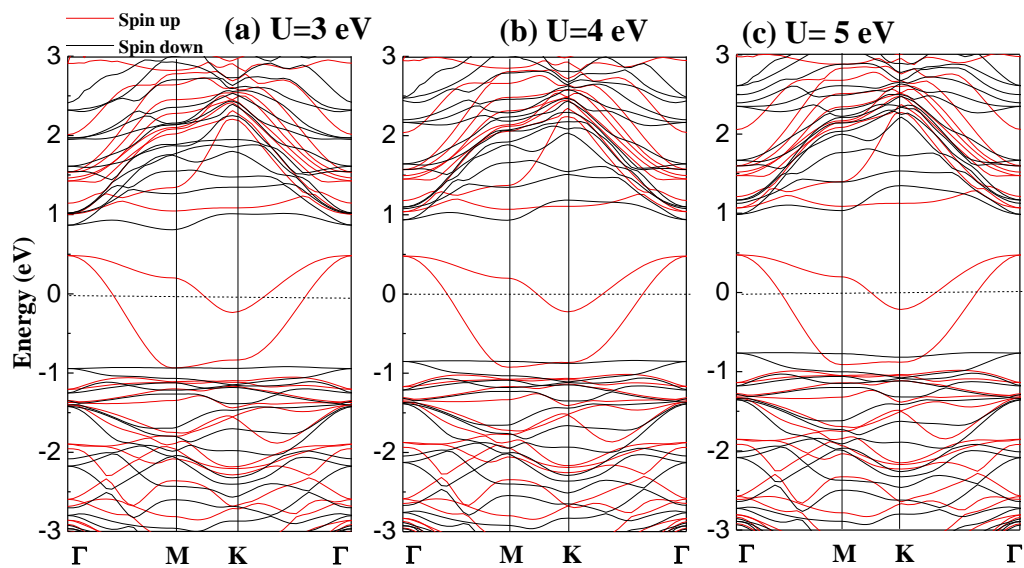

**Figure S5.** The spin-dependent band structures within PBE+U ( $U=3$  eV (a), 4 eV (b) and 5 eV (c)) for the 5.56% Mn-doped monolayer blue phosphorene based on the  $3 \times 3 \times 1$  supercell.

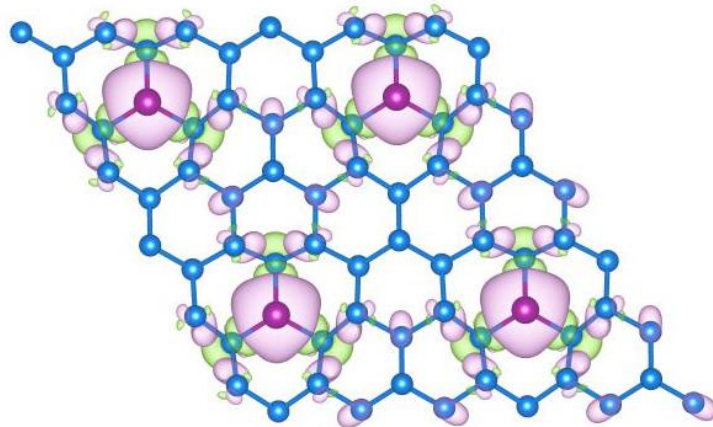

**Figure S6.** Spin density of Mn-doped monolayer blue phosphorene. Purple and cyan isosurfaces represent the positive and negative spin densities ( $0.00674 \text{ e}/\text{\AA}^3$ ), respectively.

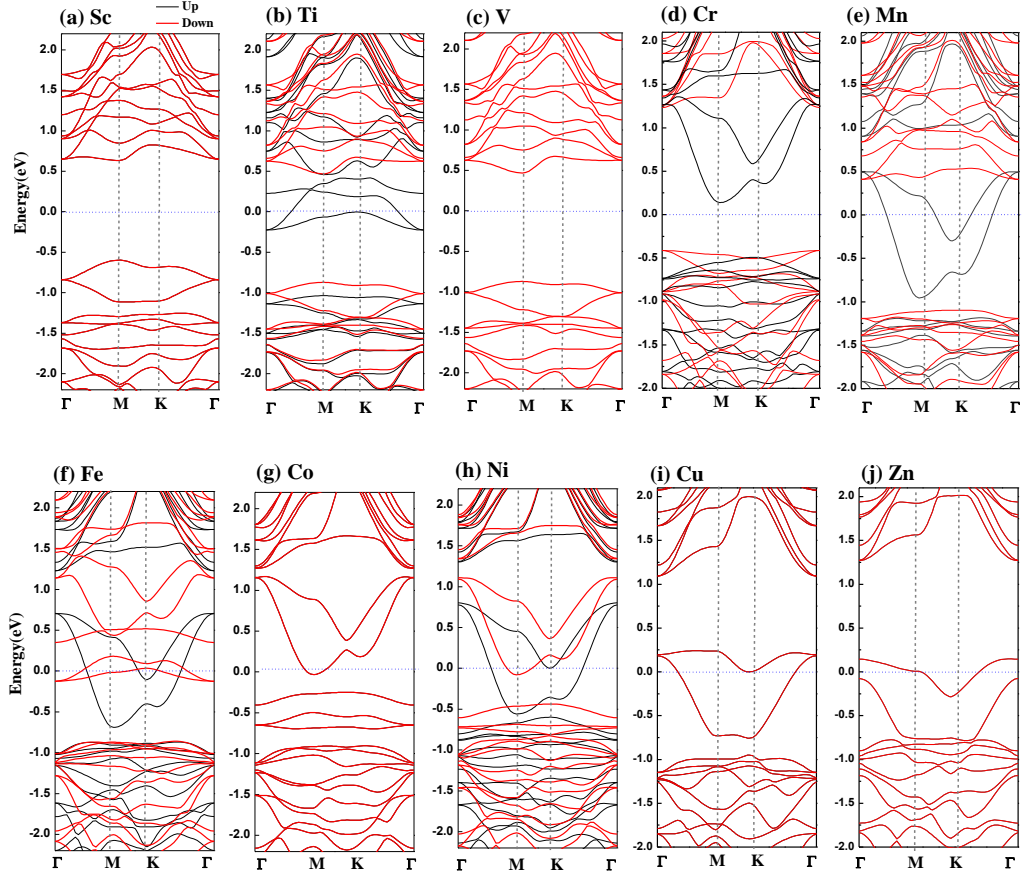

**Figure S7.** The spin-dependent band structures within GGA-PBE for the monolayer blue phosphorene doped with different transition metals based on the  $3 \times 3 \times 1$  supercell.
